# Table of Contents

## FEATURES

### *Approaches to Teaching and Learning*

**Rubrics: Tools for Making Learning Goals and Evaluation Criteria Explicit for Both Teachers and Learners**  
Deborah Allen and Kimberly Tanner .....197–203

### *From the Academies*

**National and State Standards in Science and Their Potential Influence on Undergraduate Science Education**  
Jay B. Labov .....204–209

### *Book Review*

**Tastes Like Science: Using Food to Serve Up Savory Explorations**  
Karen Kalumuck and Don Rathjen .....210–211

## ESSAY

**A Ramble through the Cell: How Can We Clear Such a Complicated Trail?**  
Joseph A. Bobich .....212–217

## ARTICLES

**Enhancing Diversity in Science: Is Teaching Science Process Skills the Answer?**  
Clarissa Dirks and Matthew Cunningham .....218–226

**Teaching Cell and Molecular Biology for Gender Equity**  
Jill C. Sible, Dayna E. Wilhelm, and Muriel Lederman .....227–238

**From Organelle to Protein Gel: A 6-Wk Laboratory Project on Flagellar Proteins**  
Beth Ferro Mitchell and Mary R. Graziano .....239–246

**How Golden is Silence? Teaching Undergraduates the Power and Limits of RNA Interference**  
Natalie H. Kuldell .....247–254

**Animated Cell Biology: A Quick and Easy Method for Making Effective, High-Quality Teaching Animations**  
Danton H. O’Day .....255–263

**A Simple and Effective Protein Folding Activity Suitable for Large Lectures**  
Brian White .....264–269

**Rethinking Exams and Letter Grades: How Much Can Teachers Delegate to Students?**  
Elizabeth Kitchen, Summer H. King, Diane F. Robison, Richard R. Sudweeks, William S. Bradshaw,  
and John D. Bell .....270–280

**Beverage-Agarose Gel Electrophoresis: An Inquiry-based Laboratory Exercise with Virtual Adaptation**  
Steven C. Cunningham, Brad McNear, Rebecca S. Pearlman, and Scott E. Kern .....281–286

**Th1/Th2 Cytokines: An Easy Model to Study Gene Expression in Immune Cells**  
José M. Morán, Rosa A. González-Polo, Germán Soler, and José M. Fuentes .....287–295

### *On the Cover*

Many cell processes, such as mitosis, are best illustrated, communicated, and understood through the use of still micrographs and dynamic movies. The Image and Video Library (IVL) of the American Society for Cell Biology (ASCB) aims to be the first comprehensive and free (to not-for-profit organizations) Internet collection of annotated, peer-reviewed, high-quality images and videos covering the field of cell biology. The library will soon be publicly accessible at <http://cellimages.ascb.org>.

The video from IVL shown on the cover shows four cycles of nuclear mitosis toward the end of the syncytial blastoderm stage in a *Drosophila* embryo. This *Drosophila* line expresses a tubulin::GFP fusion protein, allowing the processes of spindle formation and function to be observed by time-lapse confocal imaging of the fluorescent signal. Silverman-Gavrila, R., “In Perfect Synchrony—Tubulin,” ASCB Im. & Vid. Lib. 2006:VID-5 (<http://cellimages.ascb.org/u/?/p4041coll2,40>).

*A goal of CBE—Life Sciences Education is to stimulate dialogue; therefore, readers are invited to submit comments on these articles to [cbe@ascb.org](mailto:cbe@ascb.org).*
